# Supplementary material for: The effects of soil phosphorus and zinc availability on plant responses to mycorrhizal fungi: a physiological and molecular assessment
Source: PubMed Central journal article supplement (PMC6795859; doi:10.1038/s41598-019-51369-5), 2019-10-16
Supplement: 41598_2019_51369_MOESM1_ESM.pdf [file 41598_2019_51369_MOESM1_ESM.pdf]

Supplementary information

The effects of soil phosphorus and zinc availability on plant responses to mycorrhizal fungi: a physiological and molecular assessment

Authors: Thi Diem Nguyen, Timothy R. Cavagnaro, Stephanie J. Watts-Williams

Supplementary information

**Table 1.** The forward and reverse oligo sequences used to amplify housekeeping genes and genes-of-interest, gene ID (Phytozome) and brief description of genes.

| <b>Gene name</b>                      | <b>Forward primer</b>    | <b>Reverse primer</b>    | <b>Gene ID</b>  | <b>Gene</b>    |
|---------------------------------------|--------------------------|--------------------------|-----------------|----------------|
| <i>MtEF1<math>\alpha</math></i>       | TGACAGGCGATCTGGTAAGG     | TCAGCGAAGGTCTCAACCAC     | Medtr6g021800   | Housekeeping   |
| <i>MtASPP</i>                         | GGATCGGTCTTGGACAGTGG     | TGGACCGCTGATTTGACTGA     | Medtr4g095270   | Housekeeping   |
| <i>MtTRF</i>                          | GGATAAGGTGGATGGTGATCG    | TCTGCCTCTCGTCGTTTTTGT    | Medtr1g087790   | Housekeeping   |
| <i>MtZIP2</i>                         | AATGGGCATTGCTTGTGGTG     | TGTCGAAACGGCTCTTCCTC     | Medtr8g105030   | ZIP            |
| <i>MtZIP5</i>                         | GCGTCGCAACATGGACATTC     | CGGACGCTACTATCCACACC     | Medtr2g097580   | ZIP            |
| <i>MtZIP6</i>                         | AGGACTTGGAATGGGAGCCT     | CACCAAGACCCATGCCTTCA     | Medtr1g016120   | ZIP            |
| <i>MtPT1</i>                          | AGCCCGTTACACCGCTCTTG     | CATGTTCCAAACAAAGCCAAACCG | Medtr1g043220   | PT             |
| <i>MtLPCAT1</i>                       | TGGCTTAACAGCACGTTGGA     | CTGAAACCCAAGCCGGAGAT     | Medtr4g102750.1 | ?              |
| <i>MtMT4</i>                          | CCTTTATGGAACCACATGGGA    | AAGAAGGTTTCATTCCCAGCAA   | Medtr1g062300.1 | PSI            |
| <i>Ri <math>\alpha</math>-tubulin</i> | TGTCCAACCGGTTTTAAAGT     | AAAGCACGTTTGGCGTACAT     | TC105406        | Fungal biomass |
| <i>MtPT8</i>                          | GCTGCAGCTGAAAAATCAGG     | CAAGTTCACAACCGCAAGGG     | Medtr5g068140.1 | PT             |
| <i>MtPT4</i>                          | GACACGAGGCGCTTTCATAGCAGC | GTCATCGCAGCTGGAACAGCACCG | Medtr1g028600   | PT             |

(Housekeeping genes from Bravo, et al. <sup>81</sup>, ZIP genes from Watts-Williams, et al. <sup>53</sup>)
